# Supplementary material
Source: publisher site journal article supplement (https://www.dovepress.com/article/446285)
Supplement: Supplementary file 1 [file get_supplementary_file.php]

| **Supplementary Table.1** Demographic characteristics of the included studies | | | | | | | | | | | | | | | | | | | | | | |
| --- | --- | --- | --- | --- | --- | --- | --- | --- | --- | --- | --- | --- | --- | --- | --- | --- | --- | --- | --- | --- | --- | --- |
| Study ID | | Study Region | Study Design | Registration Number | Study Period | Intervention | Control | Sample Size | | Age (Years) | | Gender | | | | Glaucoma related measures | | | | | | Follow-up Periods |
| Females | | Males | | IOP (mm Hg) | | Axial length (mm) | | Anterior chamber depth (mm) | |
| Intervention | Control | Intervention | Control | Intervention | Control | Intervention | Control | Intervention | Control | Intervention | Control | Intervention | Control |
| Number | Number | Mean± SD | Mean± SD | Number | Number | Number | Number | Mean± SD | Mean± SD | Mean± SD | Mean± SD | Mean± SD | Mean± SD |
| 1 | Azuara-Blanco et al., 2016 [15] | UK | RCT | ISRCTN44464607 | Jan 8, 2009, to Dec 28, 2011 | Clear-lens extraction | Laser peripheral iridotomy | 208 | 211 | 67·0 (61·0–73·0) * | 67·0 (61·0–73·0) * | 122 | 121 | 14 | 90 | 30 (24·0 to 33·0) * | 30 (26·0 to 33·0) * | 22·5 (22·0 to 23·1) * | 22·7 (22·1 to 23·2) * | 2·5 (2·3 to 2·7) * | 2·5 (2·3 to  2·7) * | baseline and 6, 12, 24, and 36 months |
| 2 | Chan et al.,2021[16] | China | RCT | NR | February 2004 and August 2005. | phacoemulsification | laser peripheral iridotomy | 31 | 31 | 72.3 ± 7.3 | 69.0 ± 7.8 | 5 | 8 | 26 | 23 | 59.7 ± 8.7 | 57.9 ± 11.8 | 22.42 ± 0.87 | 22.46 ± 0.57 | 2.11 ± 0.51 | 1.97 ± 0.25 | 1; week 1; months 1, 3, 6, 9, 12 and then every 6 months for 18 months. |
| 3 | Dias-Santos et al., 2014 [17] | Portugal | RCT | NR | January and June 2010 | Phacoemulsification with IOL implantation | Laser peripheral iridotomy | 15 | 15 | 65.10 ± 9.49 | 69.5 ± 11.34 | 12 | 11 | 3 | 4 | 15.07 ± 3.26 | 19.93 ± 8.30 | NR | NR | 2.02 ± 0.29 | 1.82 ± 0.33 | 31.13 ± 4.97 months. |
| 4 | Husain et al., 2012 [18] | Singapore | RCT | NCT00350428 | NR | Phacoemulsification with IOL Implantation | Laser Peripheral Iridotomy | 19 | 18 | 65.9 (42–82)* | 66.1 (48–85) * | 16 | 13 | 3 | 5 | 57.4± 16.9 | 55.8± 13.2 | NR | NR | NR | NR | NR |
| 5 | Mitchell et al., 2022[19] | UK, China, Singapore, Malaysia, Australia | RCT | ISRCTN44464607 | Jan 8, 2009, to Dec 28, 2011 | Clear-lens extraction | Laser peripheral iridotomy | 182 | 187 | NR | NR | NR | NR | NR | NR | 30·0 (24·0 to 33·0) * | 30·0 (26·0 to 33·0) * | 22·5 (22·0 to 23·1) * | 22·7 (22·1 to 23·2) * | 2·5 (2·3 to 2·7) * | 2·5 (2·3 to 2·7) * | 36 months |
| Abbreviations; RCT=Randomized Controlled Trial, IOL= Intraocular Lens, * Data reported using median and range, NR=non-Reported | | | | | | | | | | | | | | | | | | | | | |  |
